# Supplementary material for: Validating expression of beta cell maturation-associated genes in human pancreas development
Source: PubMed Central journal article supplement (PMC9945361; doi:10.3389/fcell.2023.1103719), 2023-02-01
Supplement: DataSheet1.pdf [file DataSheet1.pdf]

## **Supplemental Information**

**Validating expression of beta cell maturation-associated genes in human pancreas development**

**Tremmel et al.**

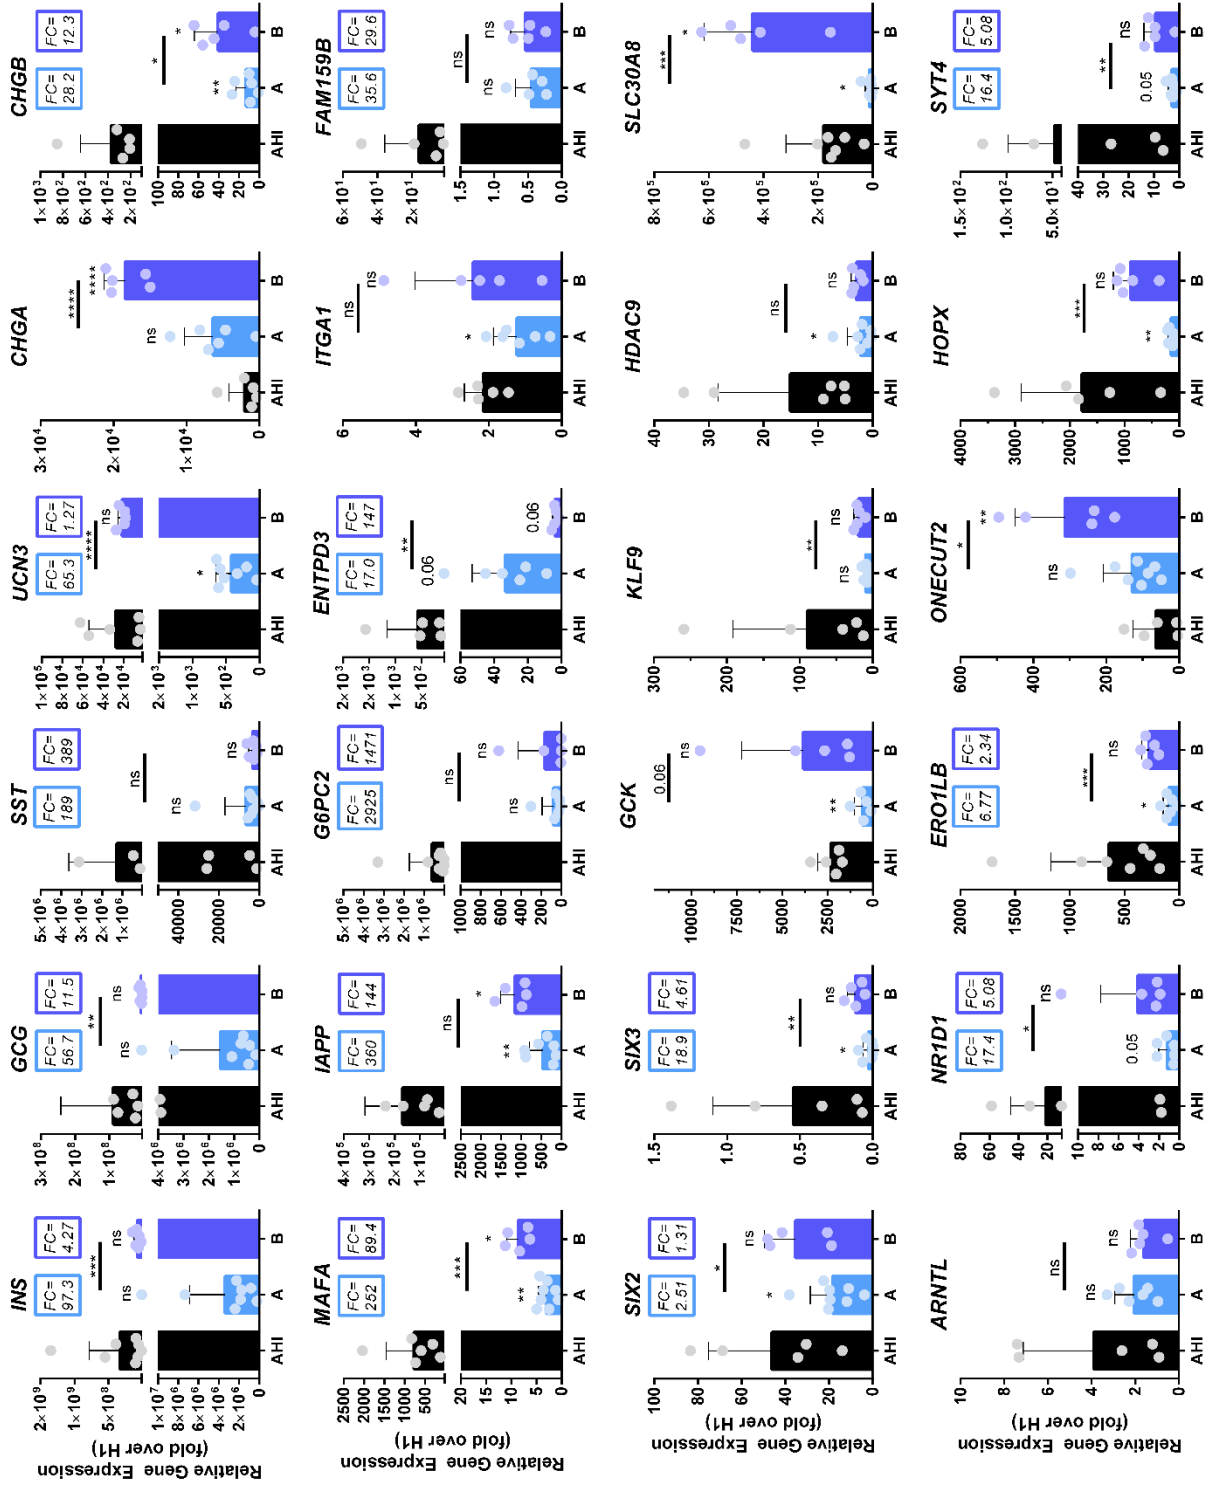

**Supplemental Fig. 1 Gene expression of SC-islets derived from Protocols A and B**

**1A)** Gene expression determined by QPCR of endocrine genes and maturation-associated genes in SC-islets derived from Protocols A (N=5-8) and B (N=5-6), compared to primary adult human islets (AHI)(N=5-7). All genes were normalized to  $\beta$  actin within the same sample, then normalized to undifferentiated H1 cells. Fold changes (FC) listed are calculated based on the relative expression between AHI and each protocol. **(Previous Page)**

**1B)** Gene expression determined by QPCR of endocrine genes and maturation-associated genes in SC-islets derived from Protocols A (N=5-8) and B (N=5-6), compared to primary adult human islets (AHI)(N=5-7) and human fetal pancreas (HFP)(N=5). All genes were normalized to  $\beta$  actin within the same sample, then normalized to undifferentiated H1 cells. To compare gene expression profiles between endocrine cells among the four samples, all samples were then normalized to CHGA within the same sample. Fold changes (FC) listed are calculated based on the relative expression between AHI and each protocol. **(Next Page)**

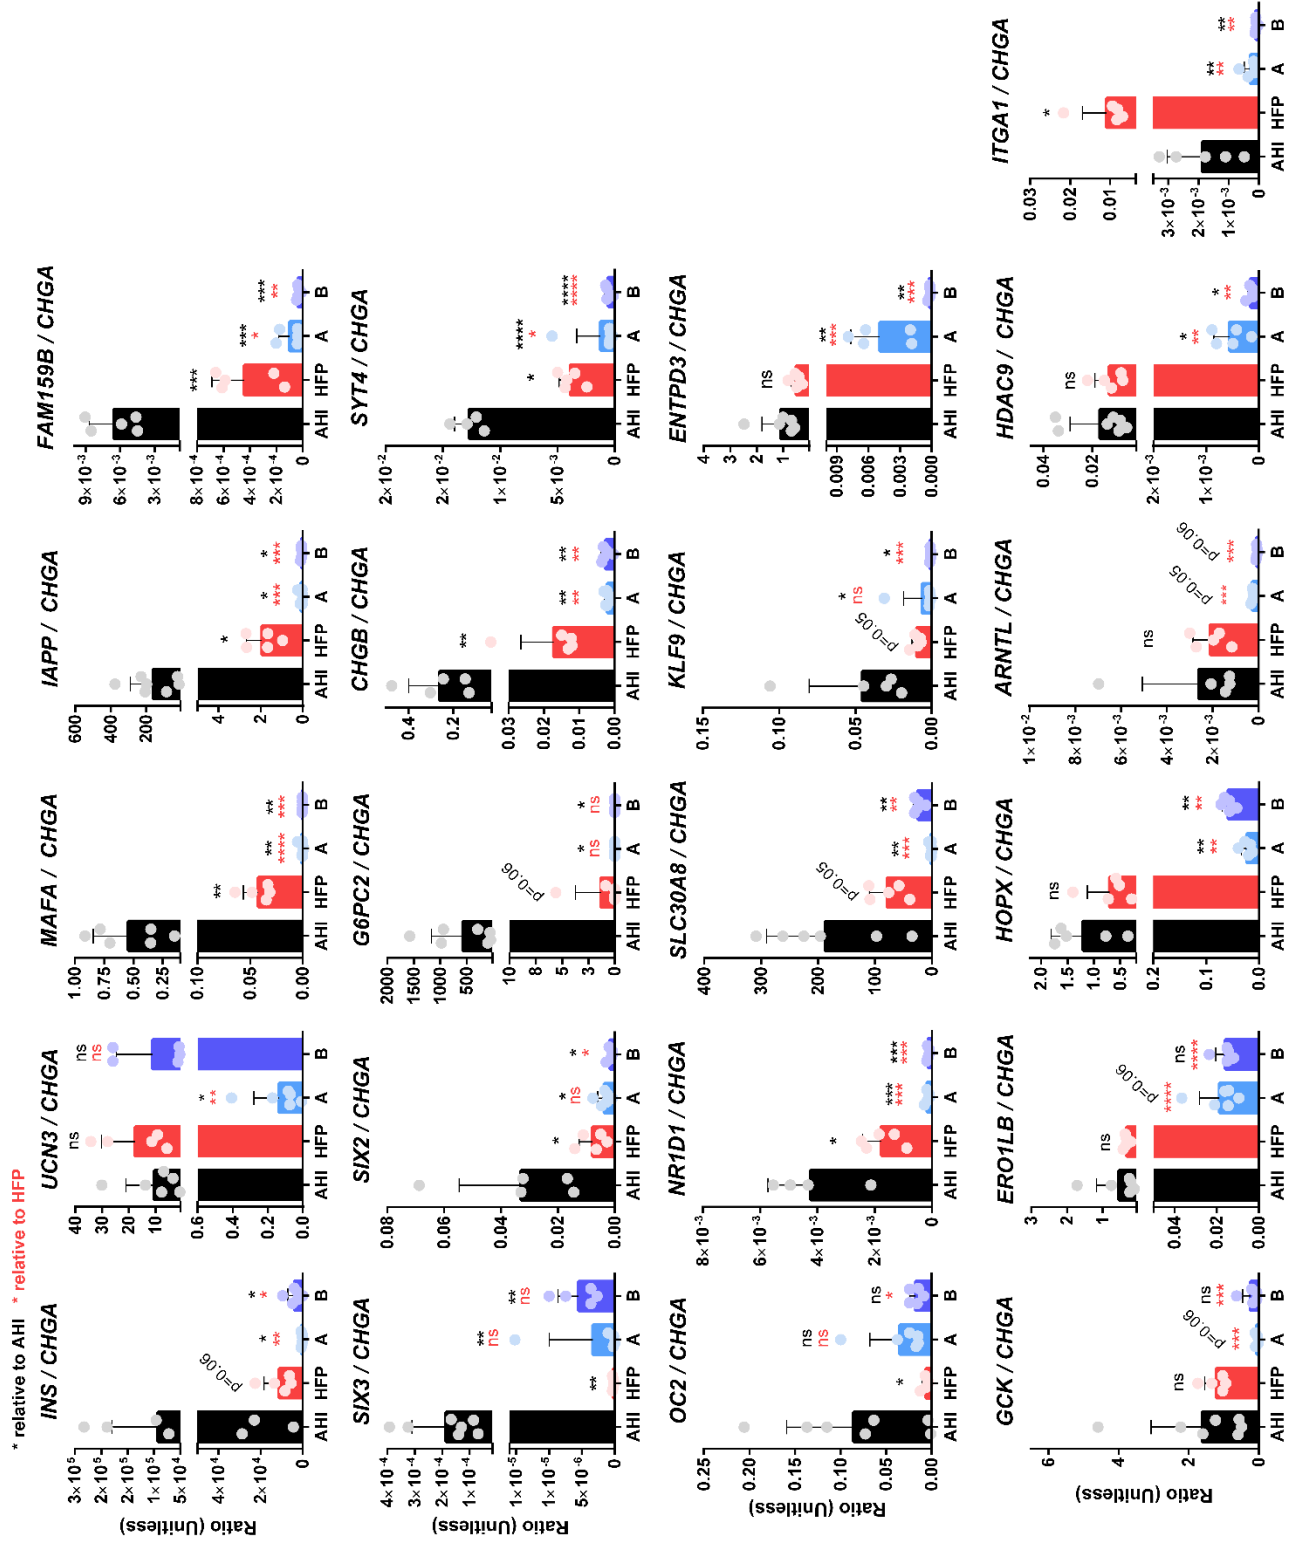





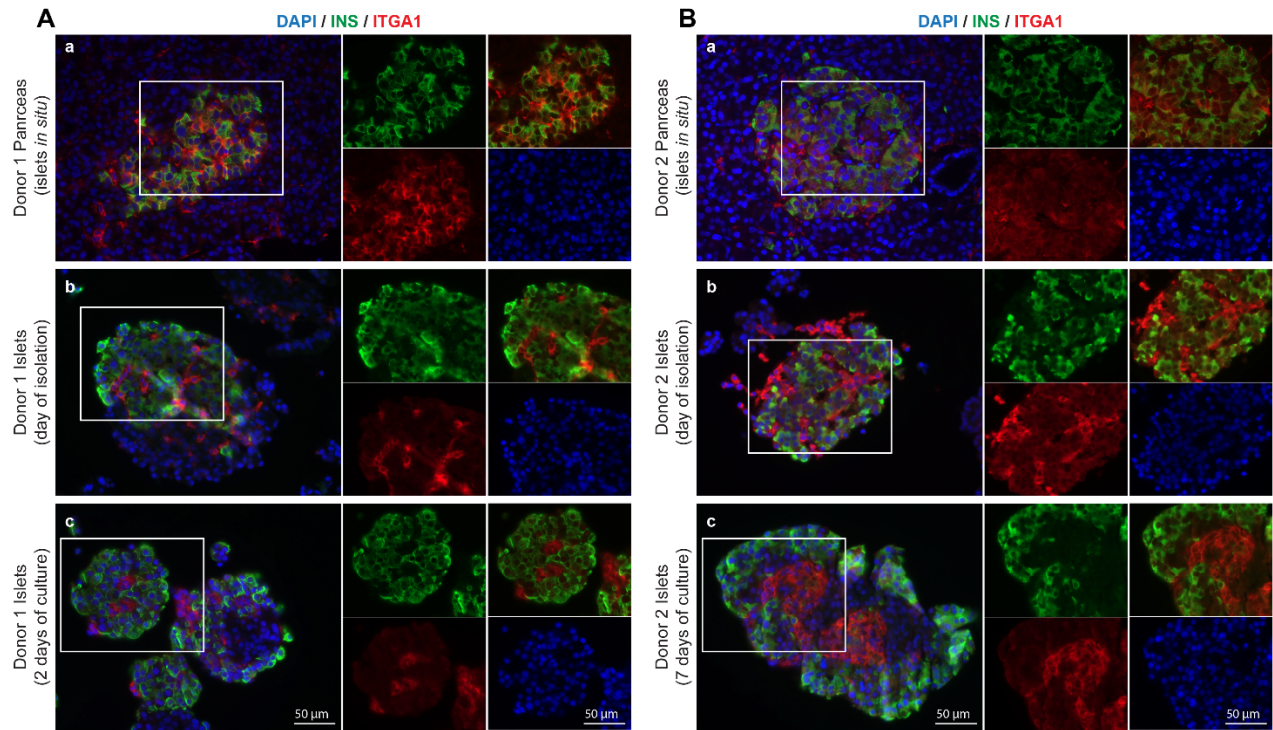

### Supplemental Fig. 3 | ITGA1 immunostaining in human islets *in situ*, during isolation, and during culture

Immunofluorescent staining of ITGA1 in islets at different stages of isolation and culture, from two different islet isolations (A, Donor A and B, Donor B). **(A)** Islets from donor A were stained before isolation (*in situ*) (a), collected during isolation (b), and collected after 2 days of culture (c). **(B)** Islets from donor B were stained before isolation (*in situ*) (a), collected during isolation (b), and collected after 7 days of culture (c).

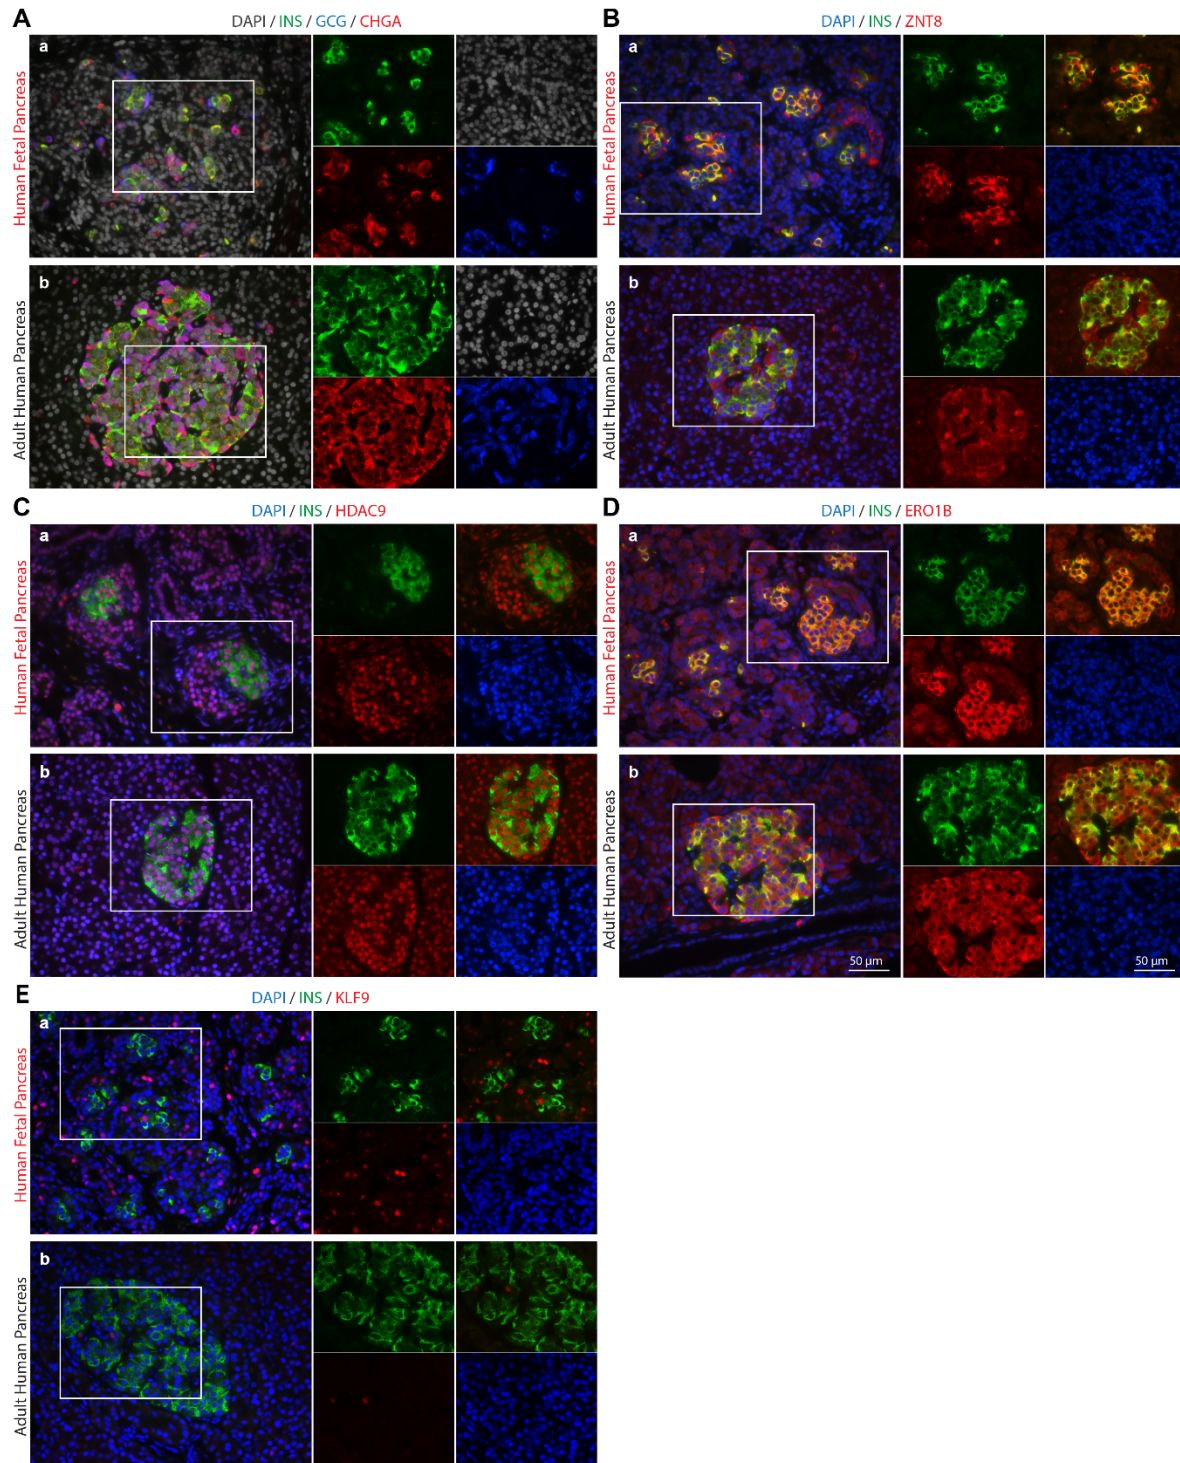

#### Supplemental Fig. 4 | Additional immunofluorescent staining of fetal and adult human islets

Immunofluorescent staining of candidate human beta cell maturation markers reveals no change in beta cell-specific expression of the markers CHGA (A), ZNT8 (B), HDAC9 (C), ERO1B (D), KLF9 (E) between human fetal and adult pancreas sections. Individual channel images are the same magnification as the larger merged images. Scale bars = 50 microns.



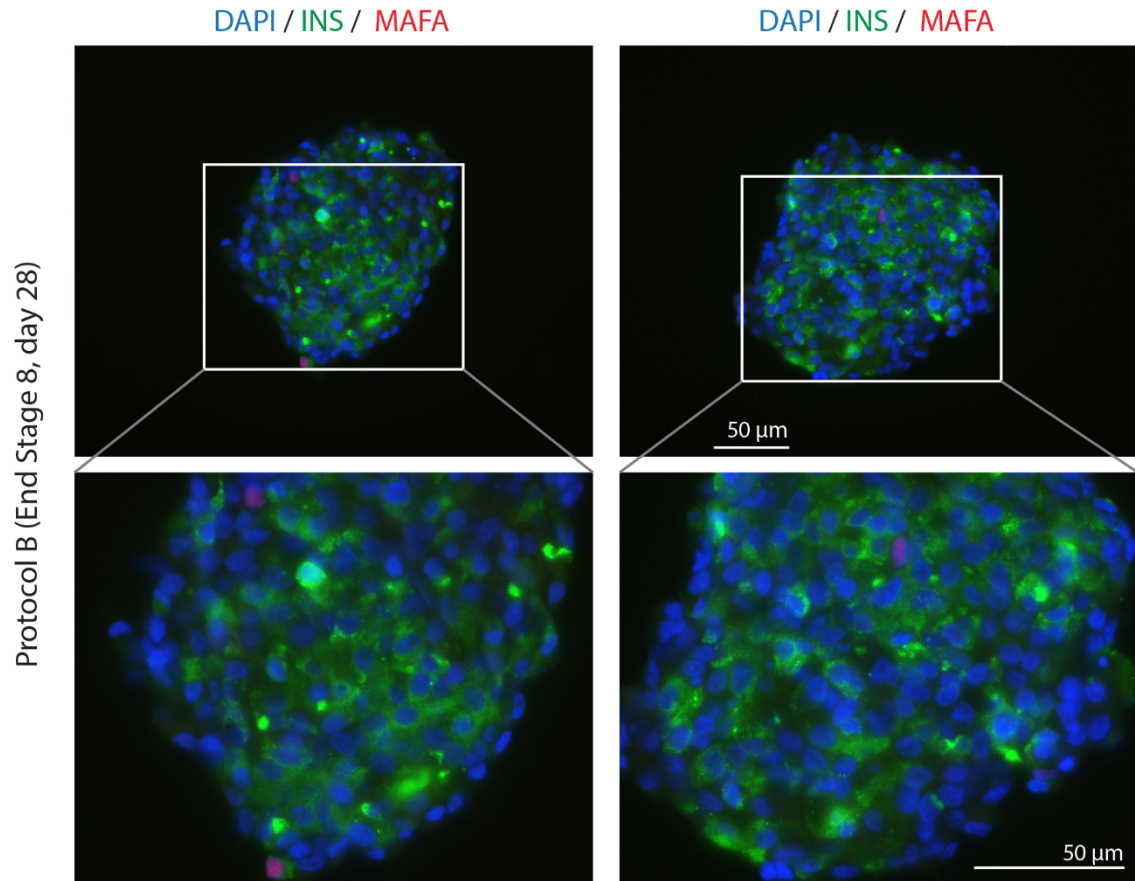

**Supplemental Fig. 5 | MAFA expression is low in Protocol B SC-islets.**

To validate the accuracy of the MAFA antibody and our findings that MAFA is expressed in human fetal beta cells, Protocol B SC-islets were stained for MAFA (red), demonstrating very low MAFA protein expression which correlates with gene expression data for these cells.

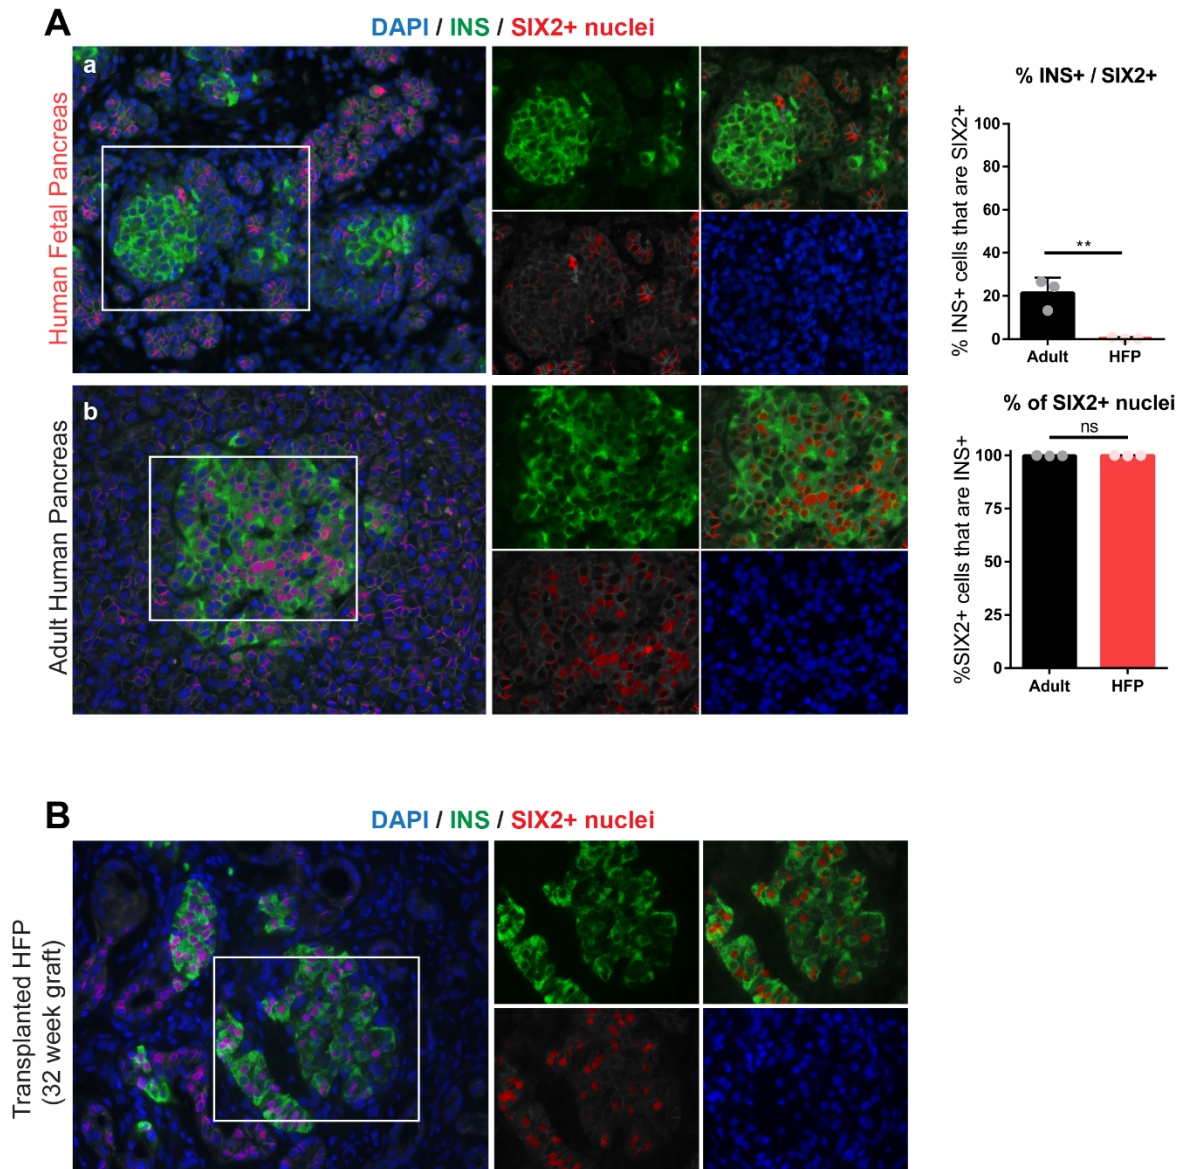

**Supplemental Fig. 6 | Nuclear SIX2 expression correlates with beta cell maturation.**

Nuclear expression of SIX2 is low in human fetal beta cells and significantly increased in adult beta cells (**A**). Nuclear expression of SIX2 is high in HFP grafts after an additional 32 weeks of *in vivo*-maturation (**B**). Representative images (N=3 donors per group).

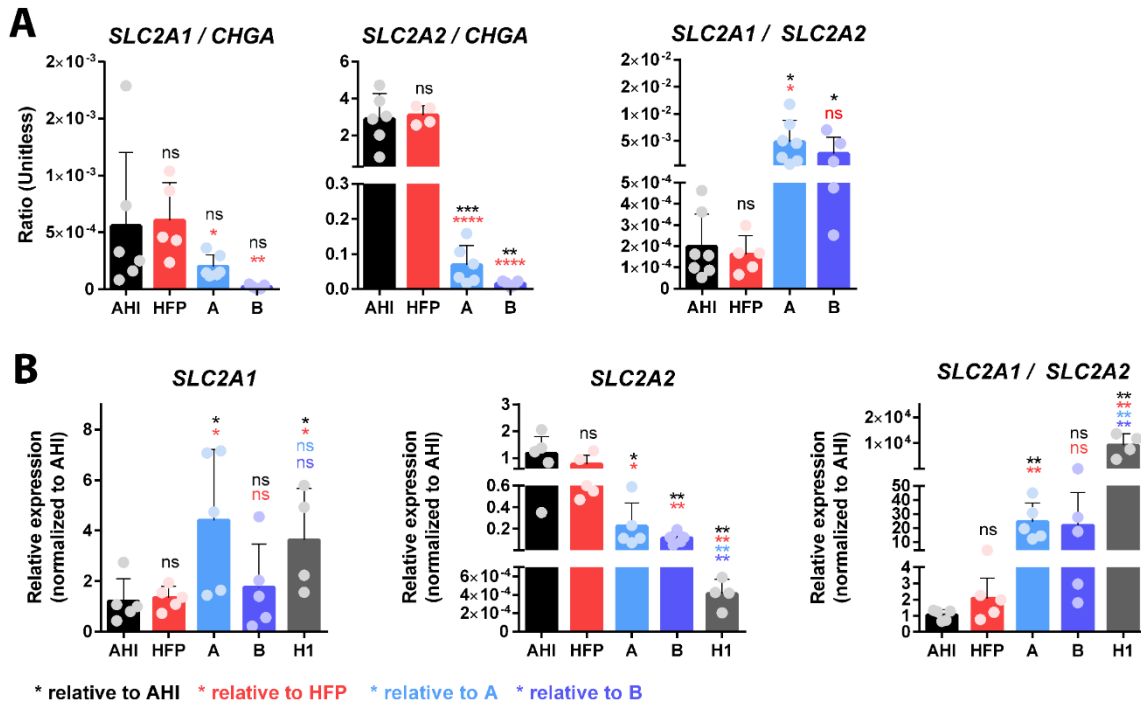

### Supplemental Fig. 7 | Expression of glucose transporters GLUT1 and GLUT2

QPCR-based analysis of gene expression of glucose transporters *SLC2A1* (GLUT1) and *SLC2A2* (GLUT2) in adult human islets (“AHI”), human fetal pancreas (“HFP”) and Protocols A (“A”) and B (“B”). **A)** Gene expression was normalized to beta-actin within the same sample, then normalized to undifferentiated H1 cells and presented as a ratio of gene expression over *CHGA* to normalize for differences in endocrine mass between the various samples. **B)** Gene expression was normalized to beta-actin within the same sample, then normalized to AHI. Statistics relative to AHI are represented in black font, relative to HFP are represented in red font, relative to Protocol A are represented in light blue font, and relative to Protocol B are represented in purple font.







**Supplemental Table 3: Basal Media**

| <b>Basal Media:</b> |                       |              |              |                            |                            |              |            |
|---------------------|-----------------------|--------------|--------------|----------------------------|----------------------------|--------------|------------|
| <b>Basal A1</b>     | MCDB131               | Glutamax 1 x | BSA 0.5%     | NaHCO <sub>3</sub> 1.5 g/L | Glucose 10mM               |              |            |
| <b>Basal A2</b>     | MCDB131               | Glutamax 1 x | BSA 2%       | NaHCO <sub>3</sub> 2.5 g/L | Glucose 10mM               |              |            |
| <b>Basal A3</b>     | MCDB131               | Glutamax 1 x | BSA 2%       | NaHCO <sub>3</sub> 1.5 g/L | Glucose 20mM               | P/S 1 x      |            |
| <b>Basal B1</b>     | RPMI                  |              |              |                            |                            |              |            |
| <b>Basal B2</b>     | IMDM: Ham's F12 75:25 | P/S 1 x      | Glutamax 1 x | BSA 0.05%                  | N2 0.5 x                   | B27 0.5 x    | MTG 0.45mM |
| <b>Basal B3</b>     | DMEM                  | P/S 1 x      |              |                            |                            |              |            |
| <b>Basal B4</b>     | MCDB131               | P/S 1 x      | Glutamax 1 x | BSA 2%                     | NaHCO <sub>3</sub> 1.5 g/L | Glucose 20mM | ITS-X 0.5X |
| <b>Basal B5</b>     | CMRL supplemented     | P/S 1 x      | AB Serum 5%  |                            |                            |              |            |

**Supplemental Table 1: Protocol A**

Protocol for differentiation under Protocol A. Reagent sources and abbreviations are defined in Supplemental Table 7.

**Supplemental Table 1: Protocol A**

Protocol for differentiation under Protocol B. Reagent sources and abbreviations are defined in Supplemental Table 7.

**Supplemental Table 3: Basal Media**

Recipes for basal media used in Protocols A and B. Reagent sources and abbreviations are defined in Supplemental Table 7.

**Supplemental Table 4: Donor Tissues****Isolated Adult Human islets**

| <b>Islet Source</b> | <b>Islet RRID</b> | <b>Age</b> | <b>Sex</b> | <b>BMI</b> | <b>Islet Purity</b> | <b>Islet Viability</b> | <b>Cause of Death</b>  |
|---------------------|-------------------|------------|------------|------------|---------------------|------------------------|------------------------|
| IIDP                | SAMN08768974      | 28 years   | Male       | 29.2       | 85%                 | 98%                    | Head trauma            |
| IIDP                | SAMN08768991      | 51 years   | Male       | 29         | 80%                 | 95%                    | Head trauma            |
| IIDP                | SAMN08769201      | 24 years   | Male       | 34.8       | 95%                 | 97%                    | Head trauma            |
| IIDP                | SAMN08769390      | 33 years   | Female     | 34.2       | 95%                 | 98%                    | Cerebrovascular/stroke |
| IIDP                | SAMN08769826      | 30 years   | Male       | 56.8       | 95%                 | 98%                    | Anoxia                 |
| IIDP                | SAMN12670838      | 40 years   | Male       | 30.7       | 90%                 | 90%                    | Head trauma            |
| Internal            | UWHI325R          | 46 years   | Male       | 39.5       | 80%                 | 98%                    | Cardiac Arrest         |

**Adult Human Pancreas**

| <b>Donor</b> | <b>Age</b> | <b>Sex</b> | <b>BMI</b> |
|--------------|------------|------------|------------|
| Donor 52     | 61 years   | Female     | 25         |
| Donor 64     | 22 years   | Male       | 33.6       |
| Donor 66     | 38 years   | Male       | 23.6       |
| Donor 68     | 57 years   | Female     | 27.2       |
| Donor 84     | 46 years   | Male       | 31.9       |
| Donor 92     | 42 years   | Male       | 23.3       |
| Donor 93     | 24 years   | Female     | 24         |
| Donor 98     | 35 years   | Male       | 26.5       |

**Human Fetal Pancreas**

| <b>Donor</b> | <b>Age</b> | <b>Sex</b> |
|--------------|------------|------------|
| HFP 85       | 18 gw      | Male       |
| HFP 88       | 18 gw      | Unk        |
| HFP 92       | 19 gw      | Unk        |
| HFP 99       | 17 gw      | Female     |
| HFP 102      | 18 gw      | Male       |

gw = gestational week

**Supplemental Table 5: Antibodies used for IF**

| Target   | Species    | Dilution | Product                                                                                     |
|----------|------------|----------|---------------------------------------------------------------------------------------------|
| CHGA     | Rabbit     | 1:400    | 23342-1-AP (Proteintech)                                                                    |
| CHGB     | Rabbit     | 1:200    | 14968-1-AP (Proteintech)                                                                    |
| ERO1LB   | Rabbit     | 1:50     | ab230540 (Abcam)                                                                            |
| FAM159B* | Rabbit     | 1:50*    | PA5-52855 (ThermoFisher)                                                                    |
| GCG      | Mouse      | 1:1000   | G2654 (Sigma)                                                                               |
| GCG      | Rabbit     | 1:2000   | ab92517 (Abcam)                                                                             |
| G6PC2*   | Rabbit     | 1:250*   | LS-C678007 (LS Bio)                                                                         |
| GLUT1*   | Rabbit     | 1:250*   | ab115730 (Abcam)                                                                            |
| HDAC9    | Rabbit     | 1:100    | MA5-33151 (ThermoFisher)                                                                    |
| IAPP     | Rabbit     | 1:1000   | ab254259 (Abcam)                                                                            |
| INS      | Mouse      | 1:5000   | I2018 (Sigma)                                                                               |
| INS      | Guinea Pig | 1:2000   | I8510 (Sigma)                                                                               |
| ITGA1*   | Rabbit     | 1:200*   | 22146-1-AP (Proteintech)                                                                    |
| KLF9*    | Mouse      | 1:150*   | CF808444 (Origene)                                                                          |
| MAFA     | Rabbit     | 1:200    | BLR067G (Bethyl)                                                                            |
| NTPDase3 | Mouse      | 1:50     | hN3-B3s ( <a href="http://ectonucleotidases-ab.com/">http://ectonucleotidases-ab.com/</a> ) |
| SIX2     | Rabbit     | 1:500    | 11562-1-AP (Proteintech)                                                                    |
| SST      | Mouse      | 1:100    | sc-74556 (Santa Cruz)                                                                       |
| UCN3     | Rabbit     | 1:2000   | Code PBL #7218, 01/12/11 bleed (from Dr. Paul Sawchenko and the Salk Institute)             |
| ZNT8     | Rabbit     | 1:2000   | ab244550 (Abcam)                                                                            |

| Target          | Color | Dilution | Product                    |
|-----------------|-------|----------|----------------------------|
| Anti-Mouse      | 488   | 1:800    | A11001 (Life Technologies) |
| Anti-Mouse      | 568   | 1:800    | A11031 (Life Technologies) |
| Anti-Mouse      | 647   | 1:800    | A21235 (Life Technologies) |
| Anti-Rabbit     | 488   | 1:800    | A21206 (Life Technologies) |
| Anti-Rabbit     | 568   | 1:800    | A11011 (Life Technologies) |
| Anti-Guinea Pig | 488   | 1:800    | A11073 (Life Technologies) |

**\*Required signal amplification (Tyramide SuperBoost™ Kit)**

Alexa Fluor™ 488 Tyramide SuperBoost™ Kit, goat anti-rabbit IgG: ThermoFisher B40922

Alexa Fluor™ 594 Tyramide SuperBoost™ Kit, goat anti-mouse IgG: ThermoFisher B40915

**Supplemental Table 6: Primers used for QPCR**

| <b>Gene</b>    | <b>Product Number</b> |
|----------------|-----------------------|
| <i>ARNTL</i>   | Hs00154147_m1         |
| <i>CHGA</i>    | Hs00154441_m1         |
| <i>CHGB</i>    | Hs01084631_m1         |
| <i>ENTPD3</i>  | Hs00154325_m1         |
| <i>ERO1LB</i>  | Hs00219877_m1         |
| <i>FAM159B</i> | Hs00971129_m1         |
| <i>G6PC2</i>   | Hs01549772_m1         |
| <i>GCK</i>     | Hs01564555_m1         |
| <i>GCG</i>     | Hs01031536_m1         |
| <i>HDAC9</i>   | Hs01081558_m1         |
| <i>HOPX</i>    | Hs05028646_s1         |
| <i>IAPP</i>    | Hs00169095_m1         |
| <i>INS</i>     | Hs02741908_m1         |
| <i>ITGA1</i>   | Hs00235006_m1         |
| <i>KLF9</i>    | Hs00230918_m1         |
| <i>MAFA</i>    | Hs01651425_s1         |
| <i>NR1D1</i>   | Hs00253876_m1         |
| <i>OC2</i>     | Hs00191477_m1         |
| <i>SIX2</i>    | Hs00232731_m1         |
| <i>SIX3</i>    | Hs00193667_m1         |
| <i>SYT4</i>    | Hs01086433_m1         |
| <i>SLC2A1</i>  | Hs00892681_m1         |
| <i>SLC2A2</i>  | Hs01096908_m1         |
| <i>SLC30A8</i> | Hs00545183_m1         |
| <i>SST</i>     | Hs00356144_m1         |
| <i>SYT4</i>    | Hs01086433_m1         |
| <i>UCN3</i>    | Hs00846499_s1         |

**Supplemental Table 7: Sources of reagents used for differentiation**

| <b>Product</b>                       | <b>Product Number</b> | <b>Supplier</b> |
|--------------------------------------|-----------------------|-----------------|
| <i>Activin A</i>                     | 338-AC-050            | R&D             |
| <i>CHIR-99021</i>                    | NC9785126             | ThermoFisher    |
| <i>Vitamin C (Ascorbic Acid)</i>     | A4544                 | Millipore Sigma |
| <i>FGF10</i>                         | PHG0204               | ThermoFisher    |
| <i>LDN (LDN183189)</i>               | S2618-2MG             | ThermoFisher    |
| <i>RA (Retinoic Acid)</i>            | R2625                 | Millipore Sigma |
| <i>SB-431542</i>                     | NC9993293             | Stemgent        |
| <i>FGF7</i>                          | 251-KG-050            | ThermoFisher    |
| <i>SANT-1</i>                        | S4572-5MG             | Cayman Chemical |
| <i>TPB</i>                           | 565740                | Millipore Sigma |
| <i>ITS-X</i>                         | 51500056              | ThermoFisher    |
| <i>Nico (Nicotinamide)</i>           | N0636-100G            | Millipore Sigma |
| <i>Heparin</i>                       | H3149                 | Millipore Sigma |
| <i>T3</i>                            | T6397                 | Millipore Sigma |
| <i>Alk5i II</i>                      | ALX-270-445-M005      | Enzo            |
| <i>Compound E (Comp E) (GSI XXI)</i> | 82602-302             | ThermoFisher    |
| <i>Forskolin</i>                     | F6886-10MG            | Millipore Sigma |
| <i>Exendin-4 (Ex-4)</i>              | E7144-.1MG            | Millipore Sigma |
| <i>R4028</i>                         | NC0532629             | ThermoFisher    |
| <i>BMP4</i>                          | 314-BP-050            | R&D             |
| <i>Trolox</i>                        | 648471-500MG          | Millipore Sigma |
| <i>NAC (N-Acetyl Cysteine)</i>       | A9165-5G              | Millipore Sigma |
| <i>Bay-K (R+) Bay K 8644)</i>        | 04-0013               | Stemgent        |
| <i>MK-801</i>                        | M107-5MG              | Millipore Sigma |
| <i>ZnSO4</i>                         | Z0251-100G            | Millipore Sigma |
| <i>Glutamax</i>                      | 35050061              | ThermoFisher    |
| <i>BSA</i>                           | A7030-50G             | Millipore Sigma |
| <i>N2</i>                            | 17502001              | ThermoFisher    |
| <i>B27</i>                           | 17504044              | ThermoFisher    |
| <i>MTG (1-Thioglycerol)</i>          | M6145-25ML            | Millipore Sigma |
| <i>P/S (Penicillin/Streptomycin)</i> | 15140122              | ThermoFisher    |
| <i>MCDB131</i>                       | 10372019              | ThermoFisher    |
| <i>CMRL</i>                          | 99-603-CV             | Cellgro         |

## **Supplemental Methods**

### *Image Quantification*

For quantification of SIX2 in images (Supplemental Fig. 5), to clean up non-specific signal, merged images were generated between the DAPI and SIX2 channels to establish the “SIX2+ nuclei” overlap. The merged image clearly revealed localization of SIX2 to the nuclei of the adult islets only and absence in the fetal tissues, in correlation with previous studies using the same antibody (Arda et al. 2016).
